# Supplementary material for: Cryptosporidium and Toxoplasma Parasites Are Inhibited by a Benzoxaborole Targeting Leucyl-tRNA Synthetase
Source: PubMed Central journal article supplement (PMC5038320; doi:10.1128/aac.00873-16), 2016-09-23

## SUPPLEMENTAL MATERIAL

### ***Cryptosporidium* and *Toxoplasma* parasites are inhibited by a benzoxaborole targeting leucyl-tRNA synthetase**

Andrés Palencia, Ru-Juan Liu, Maria Lukarska, Jiri Gut, Alexandre Bougdour,  
Bastien Touquet, En-Duo Wang, Xianfeng Li, M.R.K. Alley, Yvonne R. Freund, Philip J.  
Rosenthal, Mohamed-Ali Hakimi and Stephen Cusack

**Table S1. Binding energetics of compounds to *C. muris* LeuRS**

| Name   | Structure                                                                          | * $K_d$<br>( $\mu\text{M}$ ) | $\Delta G_{app}$<br>(Kcal mol <sup>-1</sup> ) | $\Delta H_{app}$<br>(Kcal mol <sup>-1</sup> ) | $-T\Delta S_{app}$<br>(Kcal mol <sup>-1</sup> ) |
|--------|------------------------------------------------------------------------------------|------------------------------|-----------------------------------------------|-----------------------------------------------|-------------------------------------------------|
| Nva2AA | 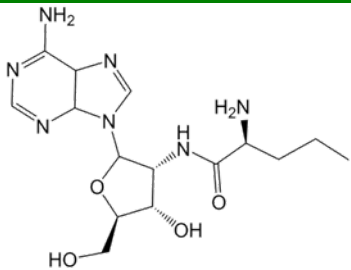  | 213±4                        | -5.0                                          | -1.7                                          | -3.3                                            |
| Ile2AA |   | 215±7                        | -5.0                                          | -0.3                                          | -4.7                                            |
| AN6426 |  | 9.8±0.3                      | -6.8                                          | 5.0                                           | -11.8                                           |

\* Values represent the mean from at least two independent experiments and errors are the standard deviations. The errors in the binding enthalpies are about 10%.

**Supplementary Figure 1. Determination of EC<sub>50</sub> values against *C. parvum*.** Dose-response curves showing the activity of AN6426 (a) and AN8432 (b) against *C. parvum* in MDCK cells. The dose-response curves were normalized to 0 % (bottom) and 100 % (top) inhibition growth. Hill slope was constrained to be < 5. EC<sub>50</sub> values were calculated by fitting the data of two independent experiments, top and bottom panels in (a) and (b). Calculated EC<sub>50</sub> values and standard deviations are shown in **Table 1**.

**a**

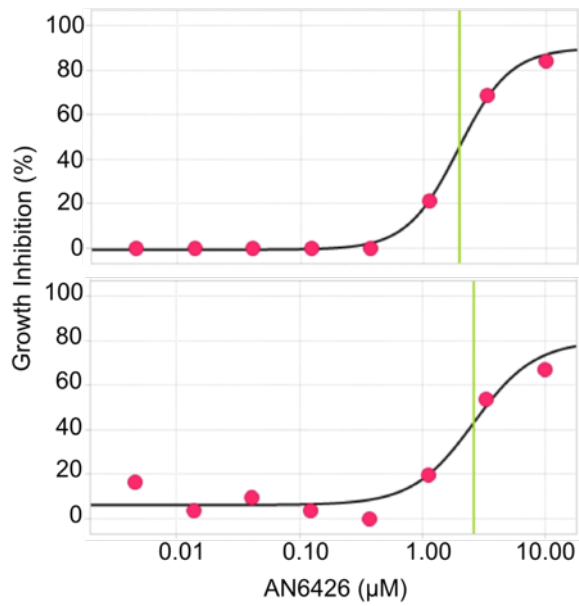

**b**

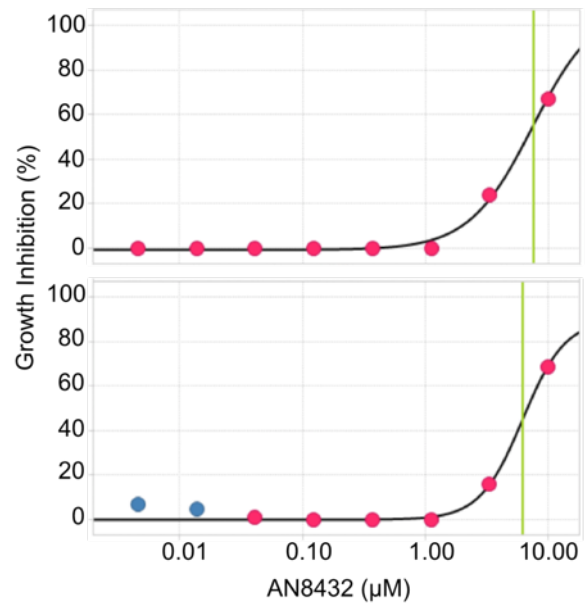

**Supplementary Figure 2. Sequence alignment of eukaryotic LeuRSs.** Sequence alignment of representative eukaryotic LeuRSs with partial conservation outlined in same color. The predicted N-terminal and C-terminal regions of the editing domain of *Cryptosporidium muris* LeuRS are indicated with arrows. The 3 insertions that are specific to apicomplexan parasites are denoted by lax1, lax2, and lax3, and are underlined with colored boxes. Key residues involved in hydrolysis of post-transfer editing substrates or in discrimination of cognate leucine are marked with stars.

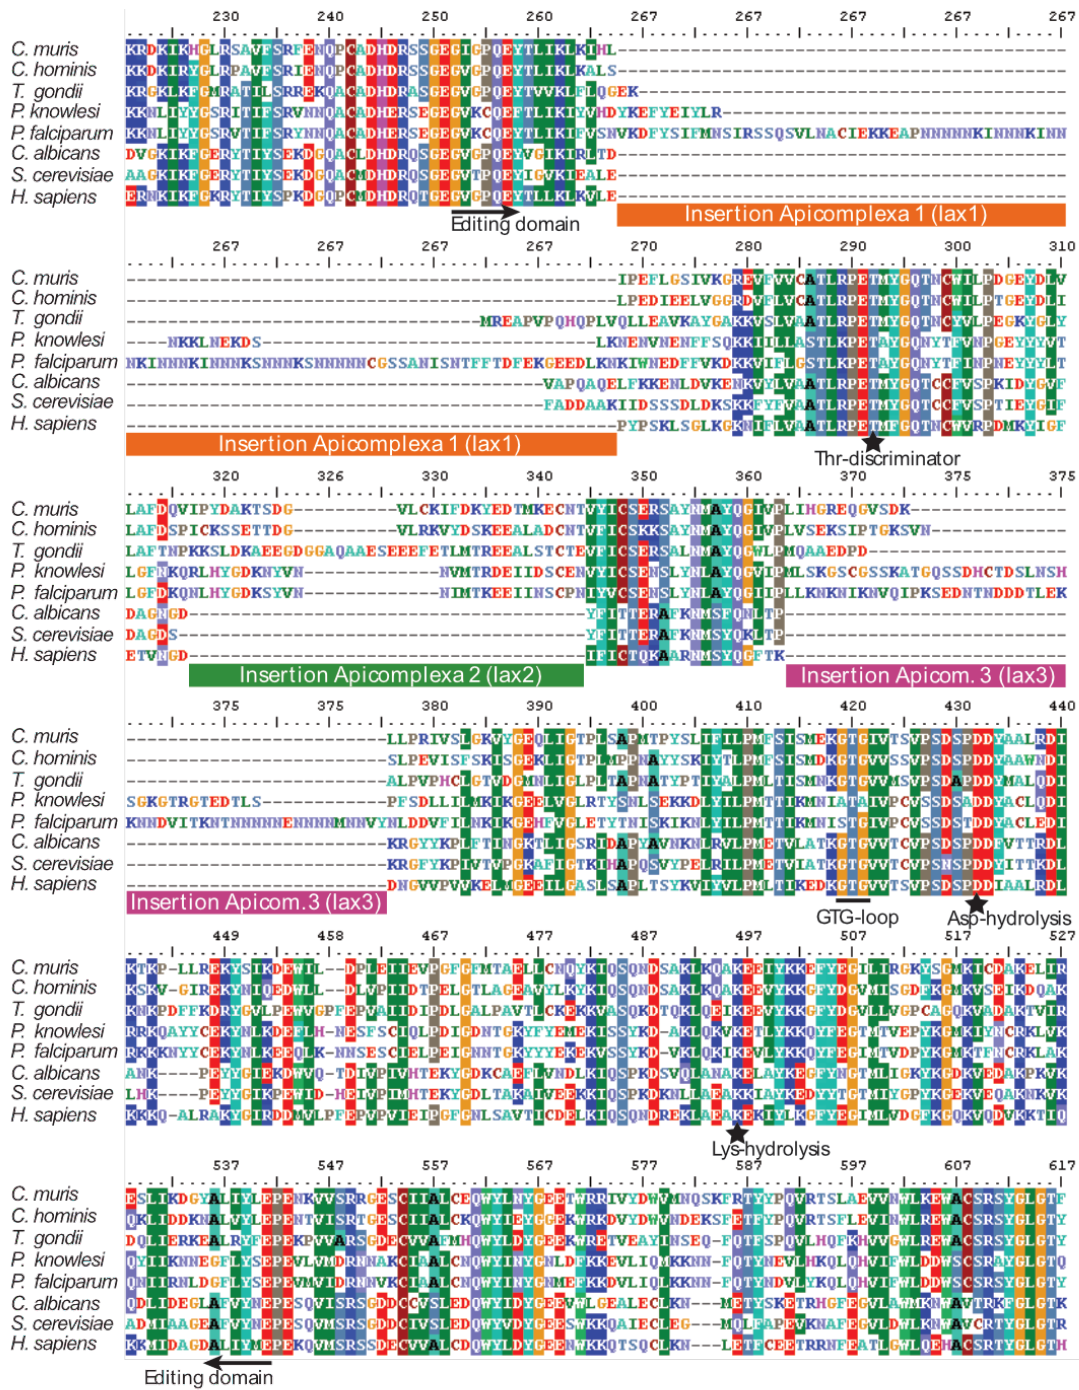

**Supplementary Figure 3. Summary of *CmLeuRS* X-ray structures.** Crystal structures of the (a) editing domain of cytosolic *CmLeuRS* (unbound), (b) *CmLeuRS* complex with post-transfer editing analogue of norvaline (Nva2AA), (c) *CmLeuRS* complex with post-transfer editing analogue of isoleucine (Ile2AA), and (d) *CmLeuRS* complex with the adduct AN6426–Ade76 bound into the editing active site. The color code is as shown in Fig 2a. Arrows in panel (a) indicate differences between the apo structure of *CmLeuRS* editing domain and the holo-structures. A discontinuous arrowed-line shows a possible correlated motion between the editing site and insertion Iax3. Insets show a zoomed view of the different ligands into the editing site of *CmLeuRS*.

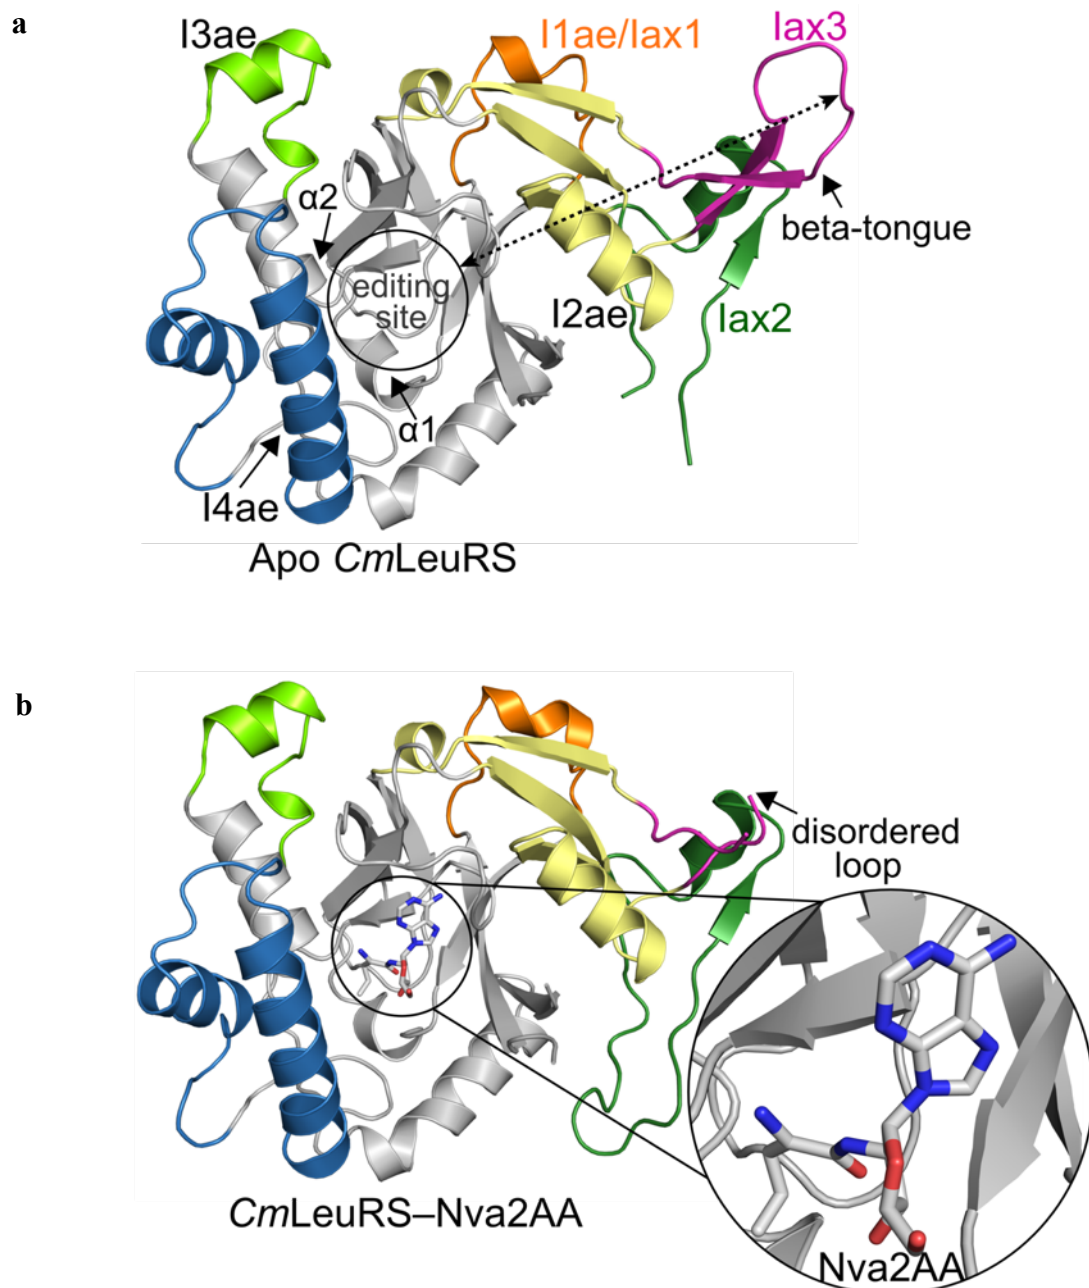

c

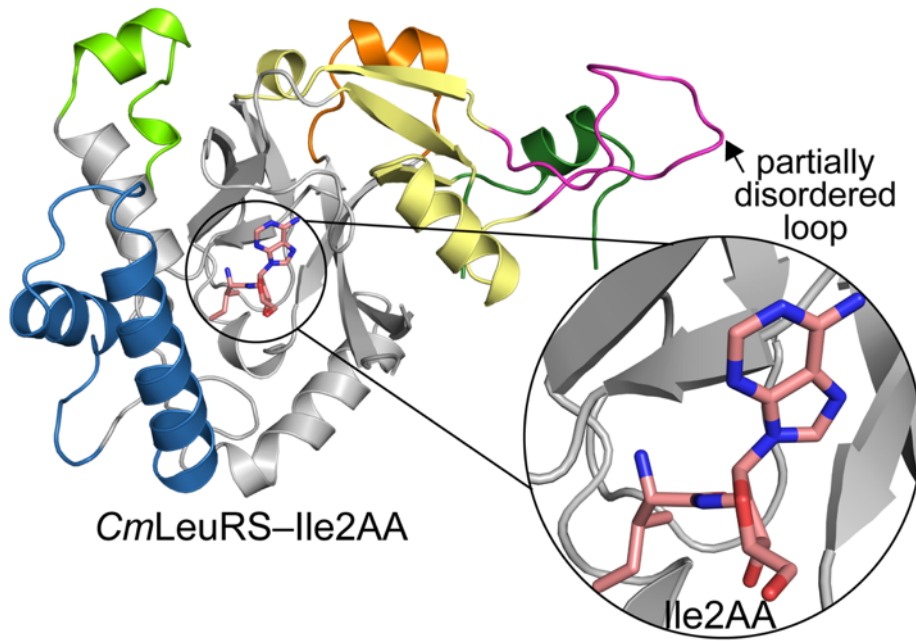

d

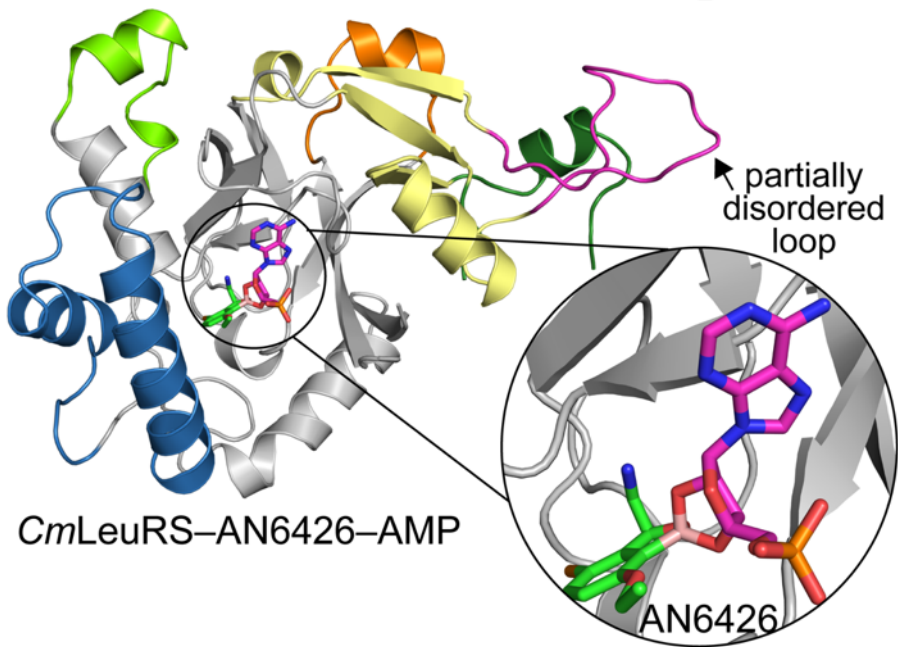

**Supplementary Figure 4. Unbiased electron density difference maps.** Stereo diagrams showing unbiased  $m(\text{Fo}-\text{Fc})$  difference electron density (contoured at  $3.5 \sigma$ ) for **(a)** post-transfer editing substrate analogue of norvaline (Nva2AA) bound into the editing site of *CmLeuRS*; **(b)** post-transfer editing substrate analogue of isoleucine (Ile2AA) bound into the editing site of *CmLeuRS*; and **(c)** the adduct formed by the benzoxaborole AN6426 with adenosine monophosphate (mimic of Ade76 tRNA base) at the editing site of *CmLeuRS*. The density was obtained by rebuilding and refinement of the molecular replacement model without inclusion of the relevant analogue or adduct.

**a**

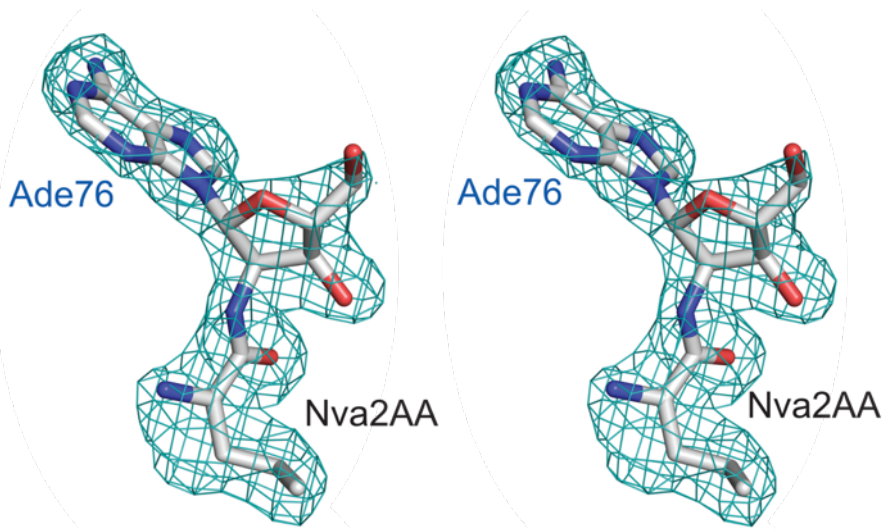

**b**

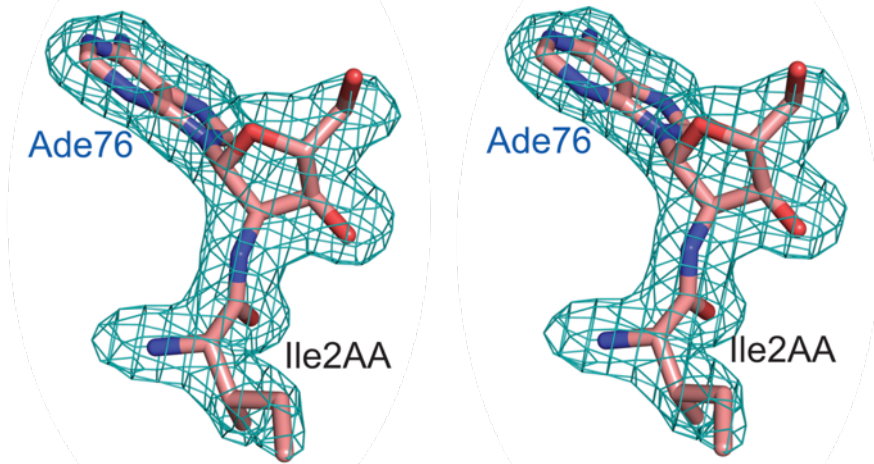

**c**

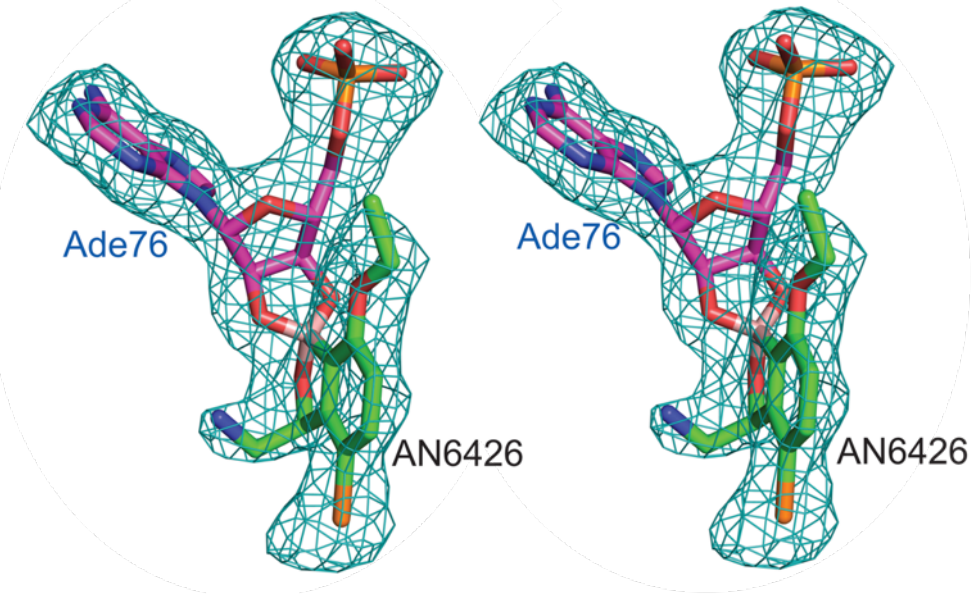



**Supplementary Figure 5. Catalytic water molecule at the editing site of LeuRSs and ThrRS.**

**(a)** Post-transfer editing analogue of norvaline (Nva2AA) bound into the editing site of *CmLeuRS* and the eukaryotic specific lysine (496) are shown as white sticks. **(b)** Post-transfer editing analogue bound into the editing site of *T.thermophilus* LeuRS (PDB:1OBC) and bacterial specific aspartic acid (D344 in *T.thermophilus*) are shown as pink sticks. **(c)** Post-transfer editing analogue of threonine (Ser3AA) bound into the editing site *P.abysii* ThrRS (PDB:3PD2) and the highly conserved lysine residue (K121 in *P.abysii*) are shown as green sticks. K121 coordinates the catalytic water molecule involved in hydrolysis of post-transfer editing substrate of serine. This catalytic water molecule (shown as red sphere) is observed at equivalent positions in eukaryotic/bacterial LeuRS, panel **(a)** and **(b)** respectively. Calculated electrostatic potential surfaces are shown in top panels, and key interactions between protein residues and the editing substrates that are mediated by the catalytic water molecule are shown as green-dashed lines.

**a**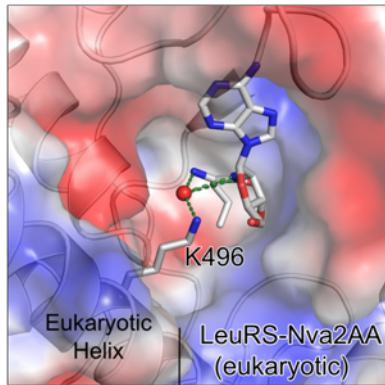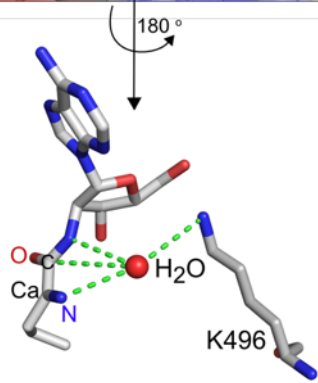**b**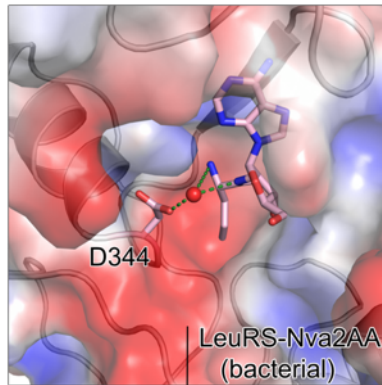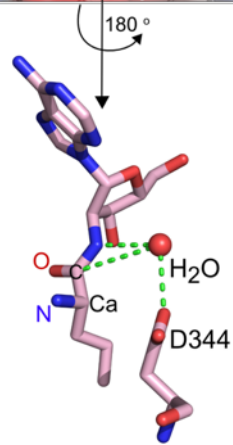**c**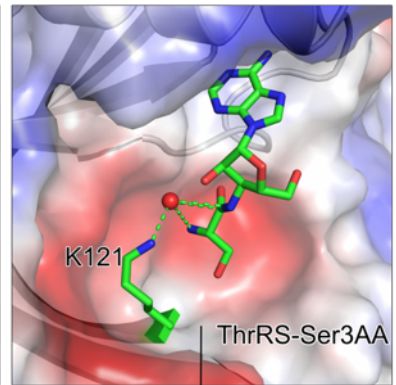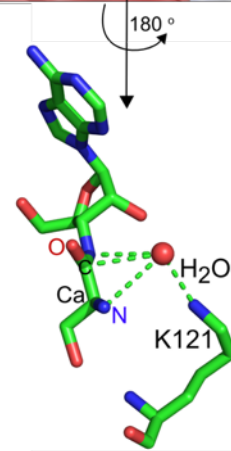

**Supplementary Figure 6. Immunofluorescence assays showing the efficacy of AN6426 against *T. gondii* parasites in human fibroblasts.** Infection of un-treated cells (control) leads to lysis of fibroblasts due to uncontrolled proliferation of parasites at 48-hours post-infection. AN6426 has efficacy to inhibit parasite growth. Treatment of infected human cells with AN6426 started 8 hours post-infection.

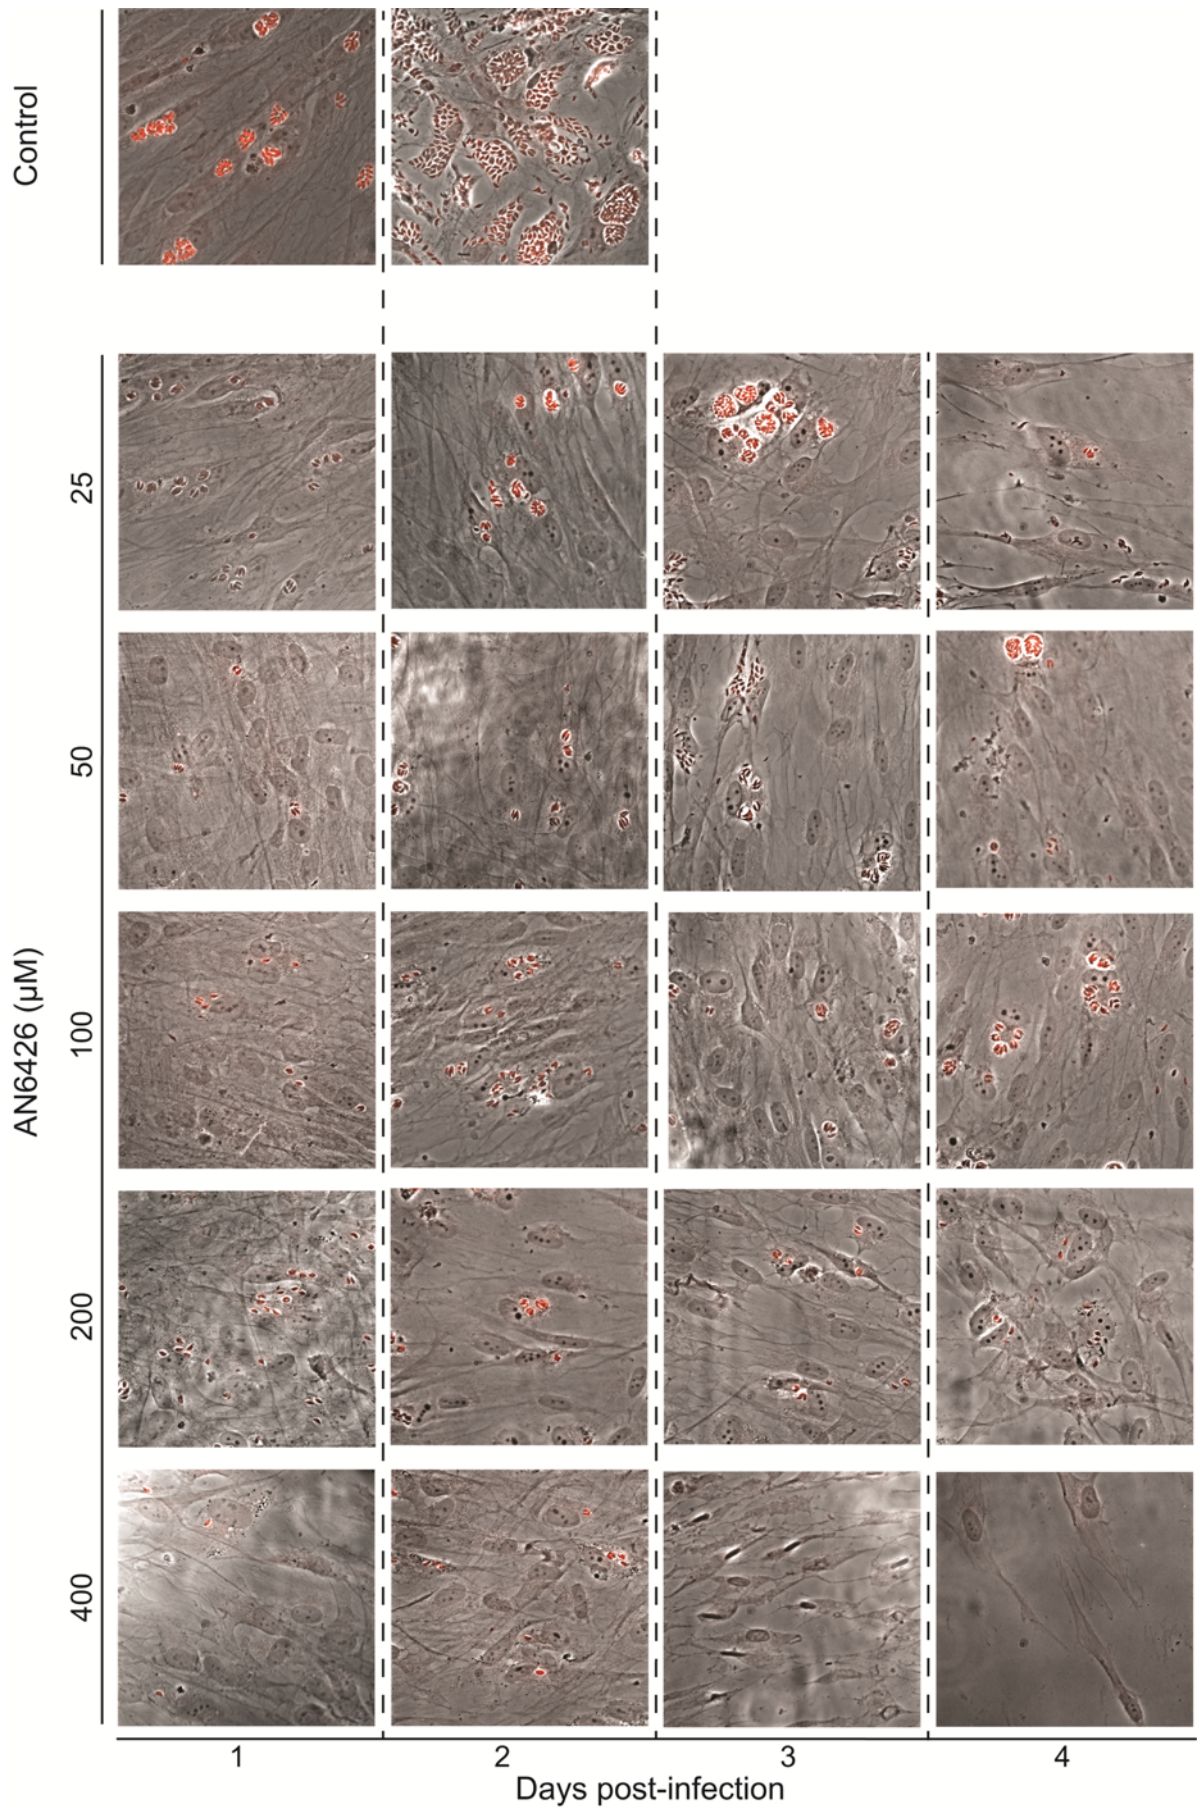

Supplement: AAC.00873-16_zac010165527so1.pdf [file AAC.00873-16_zac010165527so1.pdf]
